# Supplementary material for: Successful Treatment of Secondary Aortoenteric Fistula with a Special Graft
Source: Case Rep Med. 2016 Jan 3;2016:9874187. doi: 10.1155/2016/9874187 (PMC4735928; doi:10.1155/2016/9874187)
Supplement: Supplementary file 1 — Colonoscopy revealed ulcerative mucosal areas and aortic graft covered by thrombus. [file 9874187.f1.zip]

Archive with 2 entries (2 files):
- mat.9874187.v1.mpg
- mat.9874187.v2.mpg
